# Supplementary material for: Megamonas funiformis, Plasma Zonulin, and Sodium Intake Affect C3 Complement Levels in Inactive Systemic Lupus Erythematosus
Source: MDPI journal article supplement (doi:10.3390/nu15081999), 2023-04-21
Supplement: s1 [file s1]

Supplementary Materials

# *Megamonas funiformis*, plasma zonulin, and sodium intake affect C3 complement levels in inactive Systemic Lupus Erythematosus

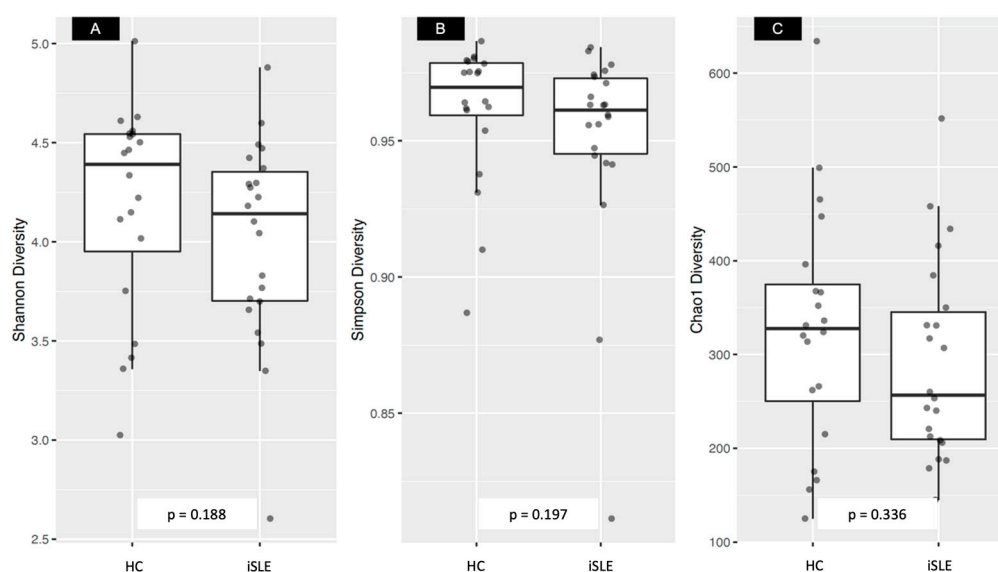

**Supplementary Figure S1.** Comparison of bacterial alpha diversity represented by (A) Shannon Index, (B) Simpson Index and (C) Chao1 Index of the Healthy Control group (HC; n = 20) versus inactive Systemic Lupus Erythematosus (iSLE; n = 22).

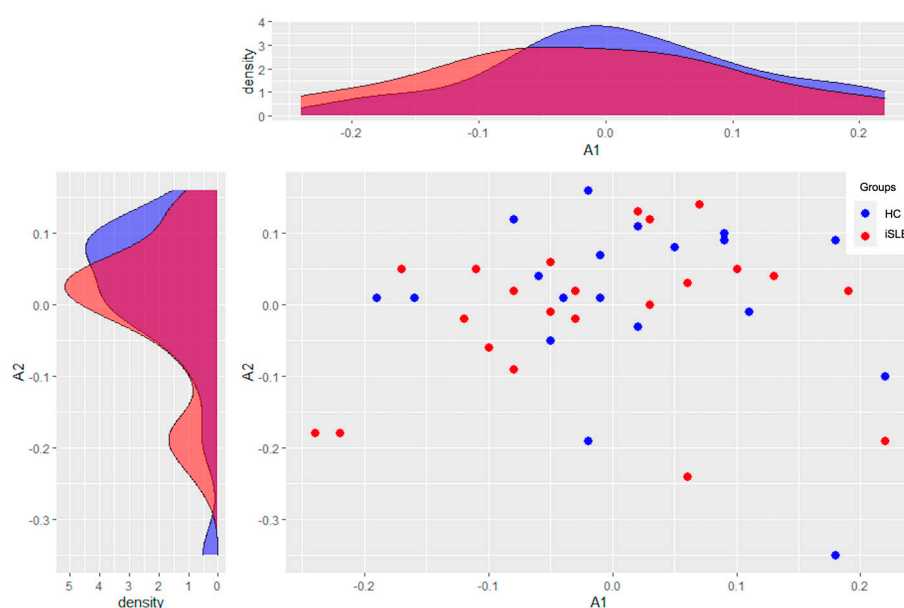

**Supplementary Figure S2.** Principal coordinate analysis of the gut microbiota macrostructure, based on the Jensen-Shannon index, comparing Healthy Control group (HC) versus inactive Systemic Lupus Erythematosus (iSLE).

**Supplementary Table S1.** Simple linear regression models for effects of variation of gut microbiota, plasma zonulin, and food intake (independent variables) in the manifestation markers of lupus disease - complement C3, C4 and C-reactive protein (dependent variables).

| Variables                      | C3 <sup>1</sup>                              | C4 <sup>1</sup>                           | CRP <sup>1</sup>                            |
|--------------------------------|----------------------------------------------|-------------------------------------------|---------------------------------------------|
| <b>Gut Microbiota</b>          |                                              |                                           |                                             |
| <i>Megamonas funiformis</i>    | −115.72 (−176.42, −55.03)<br><b>p = 0.01</b> | 45.27 (10.04, 80.50)<br><b>p = 0.05</b>   | 26.97 (20.66, 33.29)<br><b>p &lt; 0.001</b> |
| <b>Intestinal Permeability</b> |                                              |                                           |                                             |
| Plasma zonulin (ng/mL)         | −0.80 (−0.30, 1.30)<br><b>p = 0.01</b>       | 0.18 (0.02, 0.33)<br>p = 0.08             | 0.06 (0.01, 0.12)<br>p = 0.07               |
| <b>Food intake</b>             |                                              |                                           |                                             |
| Carbohydrates (g)              | −0.10 (−0.20, −0.01)<br>p = 0.10             | −0.03 (−0.06, −0.0004)<br>p = 0.12        | −0.004 (−0.01, 0.01)<br>p = 0.54            |
| Saturated Fat (g)              | 18.70 (−12.69, 50.10)<br>p = 0.34            | 4.91 (−4.36, 14.18)<br>p = 0.40           | 5.61 (3.04, 8.17)<br><b>p = 0.002</b>       |
| Cholesterol (mg)               | 0.03 (−0.08, 0.13)<br>p = 0.71               | −0.03 (−0.06, 0.005)<br>p = 0.18          | 0.01 (−0.005, 0.02)<br>p = 0.38             |
| Sodium (mg)                    | −0.08 (−0.14, −0.02)<br><b>p = 0.05</b>      | −0.004 (−0.01, −0.001)<br><b>p = 0.03</b> | −0.001 (−0.002, 0.0003)<br>p = 0.26         |
| Phosphorus (mg)                | −0.01 (−0.02, −0.0000)<br>p = 0.12           | −0.01 (−0.03, 0.01)<br>p = 0.38           | −0.001 (−0.01, 0.01)<br>p = 0.84            |
| Copper (ug)                    | −10.77 (−33.63, 12.09)<br>p = 0.45           | 4.29 (−2.34, 10.92)<br>p = 0.31           | −0.88 (−3.23, 1.47)<br>p = 0.55             |
| Manganese (mg)                 | −18.43 (−61.54, 24.68)<br>p = 0.50           | 3.01 (−9.76, 15.79)<br>p = 0.71           | −2.83 (−7.17, 1.52)<br>p = 0.30             |
| Niacin (mg)                    | 0.22 (−8.38, 8.82)<br>p = 0.97               | −0.24 (−2.77, 2.28)<br>p = 0.88           | 0.38 (−0.49, 1.25)<br>p = 0.48              |
| Vitamin B12 (ug)               | −9.37 (−20.12, 1.37)<br>p = 0.17             | −0.69 (−4.00, 2.61)<br>p = 0.74           | −0.20 (−1.36, 0.95)<br>p = 0.78             |
| Vitamin A (ug)                 | −0.01 (−0.10, 0.08)<br>p = 0.89              | 0.02 (−0.004, 0.05)<br>p = 0.18           | 0.005 (−0.004, 0.01)<br>p = 0.40            |

|                              |                                   |                                         |                                          |
|------------------------------|-----------------------------------|-----------------------------------------|------------------------------------------|
| Vitamin C (mg)               | −0.08 (−0.32, 0.17)<br>p = 0.62   | 0.03 (−0.05, 0.10)<br>p = 0.57          | −0.01 (−0.03, 0.02)<br>p = 0.70          |
| Folate (ug)                  | −0.35 (−0.82, 0.12)<br>p = 0.25   | −0.10 (−0.24, 0.04)<br>p = 0.25         | −0.09 (−0.12, −0.05)<br><b>p = 0.002</b> |
| Fruits and vegetables (g)    | −0.01 (−0.08, 0.06)<br>p = 0.74   | 0.01 (−0.02, 0.03)<br>p = 0.69          | −0.001 (−0.01, 0.01)<br>p = 0.74         |
| Juices (ml)                  | −0.05 (−0.15, 0.06)<br>p = 0.51   | 0.01 (−0.02, 0.04)<br>p = 0.55          | −0.005 (−0.02, 0.01)<br>p = 0.50         |
| Rice and Beans (g)           | 0.01 (−0.08, 0.09)<br>p = 0.88    | −0.03 (−0.05, −0.002)<br>p = 0.10       | −0.002 (−0.01, 0.01)<br>p = 0.75         |
| Pasta (g)                    | −0.14 (−0.29, 0.01)<br>p = 0.14   | −0.03 (−0.07, 0.02)<br>p = 0.37         | −0.02 (−0.03, −0.002)<br>p = 0.08        |
| Whole wheat bread (g)        | 15.42 (−0.61, 31.45)<br>p = 0.13  | 4.17 (−0.59, 8.92)<br>p = 0.17          | −0.15 (−0.22, −0.08)<br><b>p = 0.004</b> |
| Processed Meat (g)           | −0.88 (−1.71, −0.04)<br>p = 0.11  | −0.38 (−0.61, −0.16)<br><b>p = 0.02</b> | 2.24 (0.71, 3.77)<br><b>p = 0.03</b>     |
| Eggs (g)                     | −0.04 (−0.53, 0.46)<br>p = 0.91   | −0.03 (−0.18, 0.11)<br>p = 0.71         | 0.02 (−0.03, 0.07)<br>p = 0.53           |
| Cheese (g)                   | −0.06 (−0.75, 0.63)<br>p = 0.90   | 0.12 (−0.08, 0.32)<br>p = 0.34          | 0.10 (0.04, 0.16)<br><b>p = 0.02</b>     |
| Yogurt (g)                   | −4.02 (−23.07, 15.04)<br>p = 0.74 | 3.27 (−2.21, 8.76)<br>p = 0.34          | −0.70 (−2.64, 1.23)<br>p = 0.56          |
| Coffee and Tea (ml)          | 0.01 (−0.08, 0.09)<br>p = 0.92    | 0.02 (−0.004, 0.05)<br>p = 0.18         | 0.003 (−0.01, 0.01)<br>p = 0.63          |
| Sodas and Sport Drinks (g)   | 0.06 (−0.02, 0.14)<br>p = 0.25    | −0.005 (−0.03, 0.02)<br>p = 0.75        | 0.002 (−0.01, 0.01)<br>p = 0.71          |
| Sweets (g)                   | −0.04 (−0.22, 0.14)<br>p = 0.72   | −0.02 (−0.07, 0.04)<br>p = 0.61         | −0.02 (−0.03, 0.001)<br>p = 0.13         |
| Salty Pastries and Pizza (g) | 0.13 (−0.10, 0.36)<br>p = 0.36    | −0.01 (−0.08, 0.06)<br>p = 0.83         | 0.01 (−0.02, 0.03)<br>p = 0.62           |

<sup>1</sup> Univariate Regression
